# Supplementary material
Source: bioRxiv or medRxiv preprint supplement (https://www.biorxiv.org/highwire/filestream/58977/field_highwire_adjunct_files/1/038141-2.pdf)
Supplement: Supplementary file [file 038141-2.pdf]

**Table S1.** Average pairwise  $F_{ST}$  among six *P. leucopus* populations

|       | $F_{ST}$ (mean $\pm$ SE) |                   |                   |                   |                   |    |
|-------|--------------------------|-------------------|-------------------|-------------------|-------------------|----|
|       | BHwwp                    | HIP               | CFP               | CP                | NYBG              | FM |
| BHwwp | 0                        |                   |                   |                   |                   |    |
| HIP   | 0.042 $\pm$ 0.003        | 0                 |                   |                   |                   |    |
| CFP   | 0.034 $\pm$ 0.003        | 0.018 $\pm$ 0.003 | 0                 |                   |                   |    |
| CP    | 0.089 $\pm$ 0.004        | 0.060 $\pm$ 0.003 | 0.063 $\pm$ 0.004 | 0                 |                   |    |
| NYBG  | 0.070 $\pm$ 0.004        | 0.054 $\pm$ 0.003 | 0.043 $\pm$ 0.004 | 0.092 $\pm$ 0.005 | 0                 |    |
| FM    | 0.056 $\pm$ 0.004        | 0.061 $\pm$ 0.003 | 0.057 $\pm$ 0.004 | 0.109 $\pm$ 0.005 | 0.085 $\pm$ 0.005 | 0  |
